1 **Broad and differential animal ACE2 receptor usage by SARS-CoV-2**

2

3 Xuesen Zhao<sup>1, 2##\*</sup>, Danying Chen<sup>1, 2#</sup>, Robert Szabla<sup>3</sup>, Mei Zheng<sup>1, 2</sup>, Guoli Li<sup>1, 2</sup>,  
4 Pengcheng Du<sup>1, 2</sup>, Shuangli Zheng<sup>1, 2</sup>, Xinglin Li<sup>1, 2</sup>, Chuan Song<sup>1, 2</sup>, Rui Li<sup>1, 2</sup>, Ju-Tao  
5 Guo<sup>4</sup>, Murray Junop<sup>3</sup>, Hui Zeng<sup>1, 2</sup>, Hanxin Lin<sup>5\*</sup>

6 <sup>1</sup>Institute of Infectious disease, Beijing Ditan Hospital, Capital Medical University,  
7 Beijing 100015, China.

8 <sup>2</sup>Beijing Key Laboratory of Emerging Infectious Disease, Beijing 100015, China.

9 <sup>3</sup>Department of Biochemistry, Western University, 1151 Richmond Street, London,  
10 Ontario, Canada.

11 <sup>4</sup>Baruch S. Blumberg Institute, Hepatitis B Foundation, 3805 Old Easton Road,  
12 Doylestown, PA 18902. USA.

13 <sup>5</sup>Department of Pathology and Laboratory Medicine, Western University, 1151  
14 Richmond Street, London, Ontario, Canada.

15

16 Running Title: Broad animal ACE2 receptor usage by SARS-CoV-2

17

18 \* Corresponding author's e-mail address:

19 Xuesen Zhao, [zhaoxuesen@ccmu.edu.cn](mailto:zhaoxuesen@ccmu.edu.cn)

20 Hanxin Lin, [hanxin.lin@lhsc.on.ca](mailto:hanxin.lin@lhsc.on.ca)

21

22 # X.Z and D.C contributed equally to this article. Author order was determined in  
23 chronological order of participation in this study.

24 **ABSTRACT**

25       The COVID-19 pandemic has caused an unprecedented global public health and  
26 economy crisis. The origin and emergence of its causal agent, SARS-CoV-2, in the  
27 human population remains mysterious, although bat and pangolin were proposed to be  
28 the natural reservoirs. Strikingly, comparing to the SARS-CoV-2-like CoVs identified in  
29 bats and pangolins, SARS-CoV-2 harbors a polybasic furin cleavage site in its spike (S)  
30 glycoprotein. SARS-CoV-2 uses human ACE2 as its receptor to infect cells. Receptor  
31 recognition by the S protein is the major determinant of host range, tissue tropism, and  
32 pathogenesis of coronaviruses. In an effort to search for the potential intermediate or  
33 amplifying animal hosts of SARS-CoV-2, we examined receptor activity of ACE2 from  
34 14 mammal species and found that ACE2 from multiple species can support the  
35 infectious entry of lentiviral particles pseudotyped with the wild-type or furin cleavage  
36 site deficient S protein of SARS-CoV-2. ACE2 of human/rhesus monkey and rat/mouse  
37 exhibited the highest and lowest receptor activity, respectively. Among the remaining  
38 species, ACE2 from rabbit and pangolin strongly bound to the S1 subunit of  
39 SARS-CoV-2 S protein and efficiently supported the pseudotyped virus infection. These  
40 findings have important implications for understanding potential natural reservoirs,  
41 zoonotic transmission, human-to-animal transmission, and use of animal models.

42

43

44

45 **Key words:** SARS-CoV-2; animal ACE2; receptor; entry; furin cleavage; animal hosts

46

47 **Importance**

48 SARS-CoV-2 uses human ACE2 as primary receptor for host cell entry. Viral entry  
49 mediated by the interaction of ACE2 with spike protein largely determines host range and  
50 is the major constraint to interspecies transmission. We examined the receptor activity  
51 of 14 ACE2 orthologues and found that wild type and mutant SARS-CoV-2 lacking the  
52 furin cleavage site in S protein could utilize ACE2 from a broad range of animal species  
53 to enter host cells. These results have important implications in the natural hosts,  
54 interspecies transmission, animal models and molecular basis of receptor binding for  
55 SARS-CoV-2.

56

57

58

59

## 60 **Introduction**

61

62       Coronavirus disease 2019 (COVID-19) was first identified in Dec. 2019 in the city  
63 of Wuhan, China (1), and has since spread worldwide, causing ~2.3 million infected and  
64 around 160,000 fatalities as of April 18th, 2020 (<https://coronavirus.jhu.edu/map.html>).  
65 These numbers are still growing rapidly. The global COVID-19 pandemic has caused an  
66 unprecedented public health and economy crisis.

67       COVID-19 is caused by a novel coronavirus, Severe Acute Respiratory Syndrome  
68 Coronavirus 2 (SARS-CoV-2; initially named as 2019-nCoV) (2, 3). The origin of  
69 SARS-CoV-2 and its emergence in the human population remain mysterious. Many of  
70 the early cases were linked to the Huanan seafood and wild animal market in Wuhan  
71 city, raising the possibility of zoonotic origin (4). Sequencing analyses showed that the  
72 genome of SARS-CoV-2 shares 79.5%, 89.1%, 93.3%, and 96.2% nucleotide sequence  
73 identity with that of human SARS-CoV, bat coronavirus (CoV) ZC45, bat CoV  
74 RmYN02, and bat CoV RaTG13, respectively, suggesting that SARS-CoV-2 probably  
75 has bat origins (2, 3, 5). This finding is not surprising as bats are notorious for serving  
76 as the natural reservoir for two other deadly human coronaviruses, SARS-CoV and  
77 Middle East respiratory syndrome coronavirus (MERS-CoV), which previously caused  
78 global outbreak, respectively (6, 7).

79       Although SARS-CoV-2 may have originated from bats, bat CoVs are unlikely to  
80 jump directly to humans due to the general ecological separation. Other mammal  
81 species may have been served as intermediate or amplifying hosts where the progenitor  
82 virus acquires critical mutations for efficient zoonotic transmission to human. This has

83 been seen in the emergence of SARS-CoV and MERS-CoV where palm civet and  
84 dromedary camel act as the respective intermediate host (7). The Huanan seafood and  
85 wild animal market in Wuhan city would otherwise be a unique place to trace any  
86 potential animal source; however, soon after the disease outbreak, the market was  
87 closed and all the wild animals were cleared, making this task very challenging or even  
88 impossible. As an alternative, wide screening of wild animals becomes imperative.  
89 Several recent studies identified multiple SARS-COV-2-like CoVs (SL-CoVs) from  
90 smuggled Malayan pangolins in China. These pangolin CoVs (PCoV) form two  
91 phylogenetic lineages, PCoV-GX and PCoV-GD (8-11). In particular, lineage  
92 PCoV-GD was found to carry a nearly identical receptor-binding motif (RBM) in the  
93 spike (S) protein to that of SARS-CoV-2 (Fig.1). However, the genome of these  
94 pangolin SL-CoVs share only 85.5%-92.4% nucleotide identities with that of  
95 SARS-CoV-2. This is in contrast to SARS-CoV and MERS-CoV where CoVs isolated  
96 from the intermediate host palm civet and dromedary camel share 99.6% and 99.9% %  
97 genome sequence identities with their human counterpart, respectively (12, 13).  
98 Therefore, pangolins tested in these studies are not the direct intermediate host for  
99 SARS-CoV-2. Whether or not SARS-CoV-2 came from other pangolins or other wild  
100 animal species remains to be determined.

101 S protein driven cellular entry, triggered by receptor recognition, is the major  
102 determinant of host range, cell, tissue tropism, and pathogenesis of coronaviruses (14).  
103 The S protein of SARS-CoV-2 is a type I membrane glycoprotein, which can be cleaved  
104 to S1 and S2 subunit during biogenesis at the polybasic furin cleavage site (RRAR)  
105 (Fig.1) (15-18). Previous studies have shown that furin cleavage is not essential for

106 coronavirus-cell membrane fusion, but enhances cell-to-cell fusion (19-23), expands  
107 coronavirus cell tropism (24), increases the fitness of sequence variant within the  
108 quasispecies population of bovine CoV (25). Recent studies indicated that the cleavage  
109 at the S1/S2 boundary by furin in virus-producing cells is a critical prime step that  
110 facilitates conformation change triggered by receptor binding during virus entry and  
111 subsequent fusion-activating cleavage at the S2' site, which is located immediate  
112 upstream of fusion peptide in S2 subunit (18, 24, 26). Also, furin cleavage in HA was  
113 found to convert avirulent avian influenza virus isolate to a highly pathogenic isolate  
114 (27). Interestingly, this cleavage site is not present in the S protein of SARS-CoV, bat  
115 SL-CoVs or pangolin SL-CoVs identified so far (5, 15). Besides furin-mediated  
116 cleavage in virus-producing cells, SARS-CoV-2 S protein is also cleaved for fusion  
117 activation by cell surface protease TMPRSS2 and lysosomal proteases, e.g. cathepsin L,  
118 during virus entering target cells (15, 18).

119 During cell entry, S1 binds to the cellular receptor, subsequently triggering a  
120 cascade of events leading to S2-mediated membrane fusion between host cells and  
121 coronavirus particles (28). S1 protein contains an independently folded domain called  
122 the receptor binding domain (RBD), which harbors an RBM that is primarily involved  
123 in contact with receptor (Fig. 1). Human ACE2 (hACE2) has been identified as the  
124 cellular receptor for both SARS-CoV-2 (3, 15, 17, 29) and SARS-CoV (30). In addition  
125 to hACE2, ACE2 from horseshoe bat (*Rhinolophus alcyone*) was found to support cell  
126 entry of SARS-CoV-2 S-mediated VSV-based pseudotyped virus (15). By using  
127 infectious virus it has also been shown that ACE2 from Chinese horseshoe bat  
128 (*Rhinolophus sinicus*), civet and swine, but not mouse, could serve as functional

129 receptors (3). However, in this infection system, the entry step was coupled with other  
130 steps during virus life cycle, i.e. viral genome replication, translation, virion assembly  
131 and budding, and thus the receptor activity of these animal ACE2 orthologs were not  
132 directly investigated.

133 In an effort to search for potential animal hosts, we examined the receptor activity  
134 of ACE2 from 14 mammal species, including human, rhesus monkey, Chinese  
135 horseshoe bat (Rs bat), Mexican free-tailed bat (Tb bat), rat, mouse, palm civet, raccoon  
136 dog, ferret badger, hog badger, canine, feline, rabbit, and pangolin for SARS-CoV-2 and  
137 a mutant virus lacking the furin cleavage site in the S protein. Our results show that  
138 multiple animal ACE2 could serve as receptors for SARS-CoV-2 and the SARS-CoV-2  
139 mutant. ACE2 of human/rhesus monkey and rat/mouse exhibited the highest and lowest  
140 receptor activity, respectively, with the other 10 ACE2s exhibiting intermediate activity.  
141 The implications of our findings were discussed in terms of the natural reservoir,  
142 zoonotic transmission, human-to-animal transmission, animal health, and animal model.

## 143 **Results**

### 144 **Human ACE2 serves as a functional receptor for SARS-CoV-2**

145 To examine the receptor activity of human ACE2 (hACE2) for SARS-CoV-2, we  
146 first established a HIV-based pseudotyped virus entry system. This system has been  
147 widely used in studies of coronavirus entry. To improve the expression level of S protein  
148 and the yield of pseudotyped virus, a codon-optimized S gene based on the sequence of  
149 isolate Wuhan-Hu-1 (2) was synthesized and used for production of pseudotyped virus  
150 as previously described for other human coronaviruses (HCoV), including SARS-CoV,

151 MERS-CoV, NL63, 229E, and OC43 (31, 32). The pseudotyped virus was then used to  
152 infect 293T cells transfected with either empty vector, or a plasmid expressing APN  
153 (receptor for HCoV-229E), DDP4 (receptor for MERS-CoV), ACE1 or hACE2. Two  
154 days post-infection, the luciferase activity was measured. As shown in Fig. 2A, only  
155 hACE2 was able to efficiently support virus entry. The entry of SARS-CoV-2, but not  
156 influenza virus A (IVA) or HCoV-43, was blocked by antibody against hACE2 in a  
157 dose-dependent manner (Fig. 2B). We also performed a syncytia formation assay to  
158 assess the membrane fusion triggered by hACE2-S binding. As shown in Fig. 1C,  
159 syncytia formation was only seen for cells expressing hACE2, but not hACE1, mixed  
160 with cells expressing the S protein of SARS-CoV-2 or SARS-CoV. These results  
161 confirm that hACE2 is the *bone fide* entry receptor for SARS-CoV-2.

162 **Multiple animal ACE2 orthologs serve as receptors for SARS-CoV-2 and**  
163 **SARS-CoV-2 mutant with S protein lacking the furin cleavage site**

164 To test if other animal ACE2 orthologs can also be used as receptor for  
165 SARS-CoV-2, we cloned or synthesized ACE2 from rhesus monkey, Chinese horseshoe  
166 bat (Rs bat), Mexican free-tailed bat (Tb bat), rat, mouse, palm civet, raccoon dog, ferret  
167 badger, hog badger, canine, feline, rabbit, and pangolin. These animals were chosen as  
168 being either the proposed natural hosts for SARS-CoV-2 (bat, pangolin) (3, 10),  
169 intermediate hosts for SARS-CoV (civet, raccoon) (12), common animal model (rat,  
170 mouse, monkey), or household pets (canine, feline, rabbit). These ACE2 molecules were  
171 transiently expressed in 293T cells (Fig.3A), which were then infected with  
172 pseudotyped virus of SARS-CoV-2 (SARS-CoV-2pp). The luciferase activity was  
173 measured and normalized to hACE2 (Fig. 3B). The results showed that (1) ACE2 of



174 human and rhesus monkey were the most efficient receptors; (2) ACE2 of rat and mouse  
175 barely supported virus entry (<10% of hACE2); (3) the receptor activities of the other  
176 10 animal ACE2s were between human/monkey and rat/mouse. Among these, ACE2 of  
177 canine, feline, rabbit and pangolin could support virus entry at levels >50% of hACE2.

178 To examine receptor binding ability, we performed immunoprecipitation (IP)  
179 analysis by using both S1 and receptor binding domain (RBD) as probe. Among the 14  
180 different ACE2s tested, ACE2 from human, monkey, feline, rabbit and pangolin  
181 exhibited significant and consistent association with S1 and RBD (Fig.3C). Importantly,  
182 these ACE2s correspond to the group of ACE2s that supported the most efficient virus  
183 entry (Fig.3B). The Lack of significant entry reduction in 293T cells of furin mutant  
184 virus was likely due to the redundancy of cellular proteases, e.g. endosomal cathepsin,  
185 that promote membrane fusion in endosome. It has been proposed that MERS-CoV  
186 mutant having uncleaved S proteins enter cells via late endosome/lysosome (24). Two  
187 recent studies confirmed that furin cleavage of SARS-CoV-2 S protein was required for  
188 efficient entry into human lung cells (18, 33).

189 A striking difference between SARS-CoV-2 and animal SL-CoVs is the presence  
190 of a polybasic furin cleavage site at the S1/S2 boundary of the S protein (Fig.1). Here,  
191 we generated a SARS-CoV-2 S gene mutant with the furin cleavage site deleted to  
192 mimic the bat SL-CoV CZ45. This S mutant has been previously demonstrated to  
193 express a full-length non-cleaved S protein during biogenesis in cells (17). Pseudotyped  
194 virus with this mutant S protein was produced and used to infect ACE2-transfected  
195 293T cells. Similar or slightly higher efficiency were observed for the mutant S  
196 protein-mediated pseudoviral infection in cells transfected with all the animal ACE2s,

197 except for mouse, rat and civet where the mutant S protein mediated a slight lower  
198 efficiency of infection. Interesting, pangolin ACE2 was now as efficient as hACE2 for  
199 supporting mutant virus entry (Fig.3B).

200 We also tested the receptor usage of these 14 ACE2 by SARS-CoV (Fig.3D). The  
201 results indicated that ACE2 of Rs bat and rat were the poorest receptors (<20% of  
202 hACE2), while the other ACE2s could support SARS-CoV entry at levels >50% of  
203 hACE2. Interestingly, ACE2 of rabbit and pangolin were even more efficient than  
204 hACE2 for supporting SARS-CoV entry. Together, these results demonstrated that  
205 SARS-CoV-2 and its mutant virus lacking furin cleavage site, as well as SARS-CoV,  
206 could use multiple animal ACE2s as receptor.

#### 207 **Molecular basis of different ACE2 receptor activities**

208 To help understand the molecular basis of different ACE2 receptor activities, we  
209 first examined the overall sequence variation between these ACE2s. For this purpose,  
210 we constructed a phylogenetic tree based on the nucleotide sequences of ACE2s (Fig.4).  
211 Interestingly, the phylogenetic clustering of ACE2s is correlated with their abilities to  
212 support SARS-CoV-2 entry. For example, ACE2s in subclade IIA (human, rhesus  
213 monkey and rabbit) and IIB (rat and mouse) were the most efficient and poorest receptor,  
214 respectively, while ACE2s in clade I (from the remaining animals) were intermediate  
215 between subclades IIA and IIB. This correlation suggests that sequence variations that  
216 define for speciation are responsible for observed differences in receptor activity.

217 Next, based on the published crystal structures of hACE2-RBD complex we  
218 compared amino acid sequences of ACE2 receptors, focusing on 23 critical residues in  
219 close contact with RBD of SARS-CoV-2 (16, 34, 35) (Fig. 5). Two obvious patterns

220 were observed. First, hACE2 and rhesus monkey ACE2 are identical at all critical  
221 residues for RBD interaction. This explains why rhesus monkey ACE2 supported virus  
222 entry as efficient as hACE2 (Fig.3B). Second, since rat and mouse merely support virus  
223 entry, the three substitutions (D30N, Y83F and K353H) that are only seen in rat and  
224 mouse ACE2s may be the key.

225 To further explain the different receptor activities, we used homology-based  
226 structure modeling to analyze the effect of residue substitutions at the atomic level.  
227 Structure models of 14 ACE2s were generated based on the crystal structure of  
228 SARS-CoV-2 RBD/ACE2 complex (16). The effects of critical residue substitutions  
229 were analyzed and are summarized in Table 1. Overall, the predicted effects of residue  
230 substitutions in ACE2s were consistent with corresponding receptor activities. ACE2 of  
231 rodents and bats are presented as examples of this analysis (Fig.6).

232 First, we examined the rodent-unique substitutions D30N, Y83F and K353H as  
233 they may play a key role in rat and mouse ACE2 inactivity. In humans the residues at  
234 all three of these positions directly contact the RBD via hydrogen bonds. D30 contacts  
235 K417, Y83 contacts N487, and K353 appears to be at the center of a hydrogen bond  
236 network spanning seven RBD residues (Y449, G496, Q498, T500, N501, G502, Y505)  
237 and eight ACE2 residues (D38, Y41, Q42, N330, K353, G354, D355, R357). The D30N,  
238 Y83F and K353H substitutions are all predicted to disrupt these interactions in rat and  
239 mouse ACE2 (Figure 6). This is consistent with previous reports which pinpoint K353  
240 as an important hotspot for both SARS-CoV-2 (16) and SARS-CoV (36) binding. It has  
241 been experimentally demonstrated that introduction of K353H into hACE2 significantly  
242 reduces binding to SARS-CoV S1; in contrast, introduction of H353K into rat ACE2

243 significantly increases binding to SARS-CoV S1 (37). Our homology models indicate  
244 that other residue substitutions may also be contributing to the low viral entry activity in  
245 mouse and rat ACE2. Substitutions Q24N, Q27S, M82N, Q325P and E329T in rat  
246 ACE2, and L79T, M82S and E329A in mouse ACE2, are all predicted to disrupt  
247 interactions with RBD residues (Fig. 6 and Table 1).

248 Both Bat ACE2s are also inefficient receptors for viral entry (Fig.3B). Since the  
249 profile of residues at the receptor/RBD interface is significantly different from rat and  
250 mouse ACE2, we examined other bat-specific residue substitutions that may be  
251 contributing to receptor dysfunction. There are 8 and 10 critical residue substitutions in  
252 the Rs bat and Tb bat ACE2s, respectively (Fig.5). Among these, we examined the  
253 substitutions at positions Y41, H34 and E329 as they are only seen in bat ACE2s. The  
254 Y41H substitution in both bat ACE2s appears to be disrupting the same H-bond network  
255 that was disrupted by K353H in rat and mouse ACE2. Although Y41 is not as centrally  
256 located in the H-bond network as K353, it directly contacts N501 from the RBD, which is  
257 the same residue that is stabilized by K353. A second interaction which appears to be  
258 disrupted in only bat ACE2s occurs at position H34. In humans, H34 forms a H-bond  
259 with Y453 from the RBD, which is broken through a H34T substitution in bat ACE2s.  
260 Finally, the bat-unique substitution E329N appears to be disrupting H-bonds connecting  
261 two ACE2 residues (E329, Q325) and two RBD residues (N439, Q506). In Tb bat ACE2,  
262 all connections in the H-bond network are disrupted by the single E329N substitution,  
263 however the H-bond network is predicted to be restored by an additional substitution,  
264 Q325E in Rs bat. In addition, other residue substitutions, i.e. T27M and M82N in Rs bat,  
265 and D30Q and L79H in Tb bat, are also disruptive (Fig. 6).

266           These results reveal that the poor and low receptor activity of rodent ACEs and bat  
267 ACE2 are resulted from a broken interaction network by a key residue substitution, i.e.  
268 K353H in rodents and Y41H in bats, and additive disruptive effects by multiple residue  
269 substitutions.

## 270 **Discussion**

271           In this study, we examined the receptor activity of 14 ACE2 orthologues. The  
272 results suggested that wild type and mutant SARS-CoV-2 lacking the furin cleavage site  
273 in S protein could use ACE2 from a broad range of animal species to enter host cells.  
274 Below we discuss the implication of our findings in terms of natural reservoir, zoonotic  
275 transmission, human-to-animal transmission, animal health, and animal model.

### 276 **Implication in natural reservoirs and zoonotic transmission**

277           Among the 14 ACE2s tested here, hACE2 and rhesus monkey ACE2 are the most  
278 efficient receptors, suggesting that SARS-CoV-2 has already been well adapted to  
279 humans. In addition, ACE2s of other animals, except mouse and rat, could also support  
280 SARS-CoV-2 entry (Fig.3B). Although these data were obtained by using HIV1-based  
281 pseudotyped virus, for ACE2 of Rs bat, civet, and mouse, the data is consistent with *in*  
282 *vitro* infection data using infectious virus (3). Receptor usage by coronaviruses has been  
283 well known to be a major determinant of host range, tissue tropism, and pathogenesis  
284 (14, 38, 39). It is therefore reasonable to assume that SARS-CoV-2 would be able to  
285 infect all these animals. As a matter of fact, several *in vivo* infection and seroconversion  
286 studies have confirmed that SARS-CoV-2 can infect rhesus monkey (40), feline, ferret,  
287 and canine (41, 42). Our findings are also in line with the concordance between ACE2

288 receptor usage by SARS-CoV pseudotyped virus and susceptibility of the animals to  
289 SARS-CoV infection. As shown in Fig.3D, ACE2 of rhesus monkey, mouse, civet,  
290 ferret badger, raccoon and feline could support SARS-CoV pseudotyped virus entry;  
291 concordantly, all these animals are susceptible to native SARS-CoV virus infection (12,  
292 43-46).

293       Among all those wild animals that are potentially infected by SARS-CoV-2, bat  
294 and pangolin have already been proposed to be the natural reservoirs as closely related  
295 SL-CoVs have been identified in bats (2, 3, 5) and pangolins (8-11). A recent study has  
296 shown that bat SL-CoV RaTG13 could use hACE2 as receptor, consistent with the  
297 presence of several favorable hACE2-binding residues (aa 455, 482-486) in the receptor  
298 binding motif (RBM) of the S protein (Fig.1) (16). For pangolin SL-CoVs, lineage  
299 PCoV-GD has only one non-critical amino acid substitution (Q483H) in the RBM when  
300 compared to SARS-CoV-2 (Fig.1) (10). Therefore, PCoV-GD most likely can also use  
301 hACE2 and other animal ACE2s as functional receptors.

302       We also tested the receptor usage by a SARS-CoV-2 mutant that lacks the furin  
303 cleavage site at the S1/S2 boundary. Our result showed that the mutant virus behaved  
304 similarly to the wt virus. Namely, the entry of mutant virus could also be supported by  
305 those animal ACE2s that supported the entry of wt virus. This result is similar to another  
306 study that used the S gene mutant but in a MLV-based pseudotyped virus system (17)  
307 and the role of furin cleavage during coronavirus infection. Furin cleavage is not  
308 essential for coronavirus-cell membrane fusion, but enhances cell-to-cell fusion (19-22,  
309 47). This could provide certain level of advantage during infection. For example, in the  
310 quasispecies population of bovine CoV, a minor sequence variant with a polybasic

311 furin-like cleavage site in the S2 subunit quickly dominated the population even after a  
312 single passage in cells (25). However, by using pseudotyped virus system, which is a  
313 single cycle infection system, we may not see the advantage. Still, ours result  
314 unequivocally showed that SARS-CoV-2 without this cleavage site could use multiple  
315 animal ACE2s as receptors to enter cells. As there is a need to continuously search for  
316 potential intermediate hosts for SARS-CoV, results presented here can help significantly  
317 narrow down the scope of potential targets.

318 Collectively, our results highlight the potential of these wild animals to serve as  
319 natural reservoirs or intermediate hosts for SARS-CoV-2 and its progenitor, the risk of  
320 zoonotic transmission of animal SL-CoVs to human, and the necessity of virus  
321 surveillance in wild animals.

### 322 **Implication in human-to-animal transmission and animal health**

323 Among those animal species tested here, canine and feline are of special concern as  
324 they are often raised as companion pets. Our data indicate that ACE2 of canine and  
325 feline could support SARS-CoV-2 pseudotyped virus entry quite efficiently (>50% of  
326 hACE2, Fig.3B), raising the alarming possibility of virus transmission from infected  
327 human to these pets or potentially vice versa. As a matter of fact, there was a recent  
328 report that a Pomeranian dog in Hong Kong tested weakly positive for SARS-CoV-2  
329 while maintaining an asymptomatic state. The genome of the virus isolated from this  
330 dog has only three nucleotide changes compared to the virus isolated from two infected  
331 persons living in the same household, suggesting that this dog probably acquired the  
332 virus from the infected owners (48). Our results are further supported by two additional  
333 studies. One study showed that both dog and cat were susceptible to SARS-CoV-2

334 infection. While the virus replicated poorly in dogs, it replicated efficiently in cats and  
335 was able to transmit to unaffected cats that were housed with them (41). The other study  
336 revealed that 14.7% of cat sera samples collected in Wuhan city after the outbreak were  
337 positive for antibody against SARS-CoV-2, demonstrating that many cats were infected  
338 during the outbreak, most likely from infected humans in close contact (42). Domestic  
339 cats are also susceptible to SARS-CoV infection (43) and human-to-cat transmission  
340 was evident during the SARS-CoV outbreak in 2003 in Hong Kong (49). These findings  
341 were also in agreement with our results that ACE2 of cat and dog could serve as  
342 receptor for SARS-CoV (Fig.3D).

343 As described above, it seems that dogs are not as susceptible as cats to  
344 SARS-CoV-2 (41, 48). Interestingly, this is in agreement with results from IP analysis  
345 that showed cat ACE2 could bind to S1 or RBD more efficiently than dog ACE2  
346 (Fig.3C). Structural models further suggest that, at those critical RBD-binding residues,  
347 dog and cat ACE2 share 4 substitutions (Q24L, D30E, D38E, and M82T), while dog  
348 ACE2 has an additional substitution, H34Y (Fig.5). Based on structural modeling, both  
349 Q24L and M82T are predicted to be disruptive, while both D30E and D38E are  
350 tolerable (Table 1). H34Y in dog ACE2 is predicted to disrupt the hydrogen bond with  
351 Y453 of RBD (Table 1). These atomic interactions explain why dog ACE2 binds to S1  
352 or RBD less efficiently compared to cat ACE2, and both are less efficient than human  
353 ACE2.

354 In addition to cat and dog, rabbits are also often raised as household pets. Our  
355 results indicate that rabbit ACE2 is an efficient receptor (Fig. 3B and 3C), suggesting  
356 that rabbit may be more susceptible to SARS-CoV-2 infection than cat.



357           Currently, there is no evidence that infected pets can transmit the virus back to  
358 human; however, this may be possible and should be investigated. Out of an abundance  
359 of caution it would be best when one is infected to have both human and pets  
360 quarantined, and the pets tested as well.

### 361 **Implication in animal model**

362           Animal models are essential for study of pathogenesis, vaccinology and  
363 therapeutics of viral pathogens. Rodents are probably the most common and amenable  
364 animal models because of low cost, easy handling, defined genetics, and the possibility  
365 of scalability (50). However, our results showed that both mouse and rat ACE2 are poor  
366 receptors for SARS-CoV-2 (Fig.3B and 3C), suggesting that they are probably resistant  
367 to infection. Actually, this has been verified by using infectious SARS-CoV-2 to infect  
368 mouse ACE2-transfected cells (3) or mice (51). Genetically engineered mice expressing  
369 hACE2 were previously developed as an animal model for SARS-CoV (52). This model  
370 has been tested recently for SARS-CoV-2, and found to be susceptible to SARS-CoV-2  
371 infection and development of interstitial pneumonia (51), a common clinical feature of  
372 COVID-19 patients (53). Human ACE2-transgenic mice therefore represent useful  
373 animal models. However, because of the high demand, and discontinuance due to the  
374 disappearance of SARS-CoV in the human population after 2004, it is expected that this  
375 mouse model will be in short supply (54). Alternative methods should be sought to  
376 develop a mouse-adapted SARS-CoV-2 strain. Mouse-adapted SARS-CoV strains were  
377 developed by serial passage of virus in mice (55, 56). However, this method may not  
378 work for SARS-CoV-2 as mouse ACE2 still supports some entry for SARS-CoV  
379 (Fig.3D), but not SARS-CoV-2. An alternative way to make a mouse-adapted

380 SARS-CoV-2 strain could be achieved by rational design of the S gene. Based on the  
381 structural model, we know that receptor dysfunction of mouse ACE2 is due to  
382 disruptive D30N, L79T, M82S, Y83F, E329A and K353H substitutions (Fig.5, Fig.6 and  
383 Table 1). Therefore, by specifically introducing mutations into the RBM of S gene it  
384 may be possible to restore or at least partly restore interactions with these ACE2  
385 substitutions. Consequently, the engineered virus may be able to efficiently infect  
386 wildtype mice.

387 To date, several animals (i.e. rhesus monkey, ferret, dog, cat, pig, chicken and duck)  
388 have been examined as potential animal models for SARS-CoV-2 (40, 41). Although  
389 the rhesus monkey, ferret and cat may seem to be the promising candidates, none of  
390 them are perfect in terms of recapitulation of typical clinical features in COVID-19  
391 patients. Therefore, multiple animal models may be needed. Our results indicate that  
392 rabbit ACE2 is a more efficient receptors than other animal ACE2s for both  
393 SARS-CoV-2 and SARS-CoV (Fig.3). Therefore, it may be worthy assessing rabbit as a  
394 useful animal model for further studies.

## 395 **Methods**

### 396 **Cell lines and antibodies**

397 293T cells and Lenti-X 293T cells were cultured in Dulbecco's modified Eagle's  
398 medium (DMEM; Gibco) (57). All growth medium was supplemented with 10% fetal  
399 bovine serum (FBS), 110 mg/L sodium pyruvate, and 4.5 g/L D-glucose.  $\beta$ -actin  
400 antibody and C9 antibody were purchased from Sigma (A2228) and SANTA CRUZ  
401 (sc-57432), respectively. A polyclonal antibody against human ACE2 and anti-IDE  
402 polyclonal antibody were purchased from R&D Systems (catalog No. AF933 and

403 AF2496, respectively).

#### 404 **Construction of ACE2 plasmids**

405 ACE2 of human (*Homo sapiens*, accession number NM\_001371415.1), civet  
406 (*Paguma larvata*, accession number AY881174.1), and rat (*Rattus norvegicus*, accession  
407 number NM\_001012006.1) were cloned into a modified pcDNA3.1-cmyc/C9 vector  
408 (Invitrogen) as previously described (37, 58). ACE2 protein expressed from this vector  
409 has a c-myc tag at the N-terminus and a C9 tag at the C-terminus. An Age I site was  
410 engineered right downstream of the signal peptide sequence (nt. 1-54) of ACE2. ACE2  
411 protein expressed from this vector has a c-myc tag at the N-terminus and a C9 tag at the  
412 C-terminus. ACE2 of Chinese ferret badger (*Melogale moschata*, accession number  
413 MT663957), raccoon dog (*Nyctereutes procyonoides*, accession number MT663958),  
414 Mexican free-tailed bat (*Tadarida brasiliensis*, accession number MT663956), rhesus  
415 monkey (*Macaca mulatta*, accession number MT663960), hog badger (*Arctonyx*  
416 *collaris*, accession number MT663962), New Zealand white rabbit (*Oryctolagus*  
417 *cuniculus*, accession number MT663961), domestic cat (*Felis catus*, accession number  
418 MT663959) and domestic dog (*Canis lupus familiaris*, accession number MT663955)  
419 were cloned into Age I/Kpn I-digested pcDNA3.1-cmyc-C9 vector previously (Hanxin  
420 Lin, Ph. D Thesis Dissertation. "Molecular interaction between the spike protein of  
421 human coronavirus NL63 and ACE2 receptor" McMaster University, Health Science  
422 Library.[https://discovery.mcmaster.ca/iii/encore/record/C\\_\\_Rb2023203\\_\\_SMolecular%](https://discovery.mcmaster.ca/iii/encore/record/C__Rb2023203__SMolecular%20interaction%20between%20the%20spike%20protein%20of%20human%20coronavir%20us%20NL63%20and%20ACE2%20receptor%20Lw%3D%3D%20by%20Hanxin%20Lin__Orightresult__U__X4?lang=eng&suite=def)  
423 [20interaction%20between%20the%20spike%20protein%20of%20human%20coronavir](https://discovery.mcmaster.ca/iii/encore/record/C__Rb2023203__SMolecular%20interaction%20between%20the%20spike%20protein%20of%20human%20coronavir%20us%20NL63%20and%20ACE2%20receptor%20Lw%3D%3D%20by%20Hanxin%20Lin__Orightresult__U__X4?lang=eng&suite=def)  
424 [us%20NL63%20and%20ACE2%20receptor%20Lw%3D%3D%20by%20Hanxin%20Li](https://discovery.mcmaster.ca/iii/encore/record/C__Rb2023203__SMolecular%20interaction%20between%20the%20spike%20protein%20of%20human%20coronavir%20us%20NL63%20and%20ACE2%20receptor%20Lw%3D%3D%20by%20Hanxin%20Lin__Orightresult__U__X4?lang=eng&suite=def)  
425 [n\\_\\_Orightresult\\_\\_U\\_\\_X4?lang=eng&suite=def](https://discovery.mcmaster.ca/iii/encore/record/C__Rb2023203__SMolecular%20interaction%20between%20the%20spike%20protein%20of%20human%20coronavir%20us%20NL63%20and%20ACE2%20receptor%20Lw%3D%3D%20by%20Hanxin%20Lin__Orightresult__U__X4?lang=eng&suite=def)). The nucleotide sequence of ACE2 of

426 Chinese horseshoe bat (*Rhinolophus sinicus*, Rs, accession number KC881004.1) and  
427 pangolin (*Manis javanica*, accession number XM\_017650263.1) were synthesized and  
428 cloned into pcDNA3.1-N-myc/C-C9 vector.

#### 429 **Construction of plasmids expressing S, S1 and RBD of SARS-CoV-2**

430 The nucleotide sequence of SARS-CoV-2 S gene was retrieved from NCBI  
431 database (isolate Wuhan-Hu-1, GenBank No. MN908947). According the method  
432 described by Gregory J. Babcock et al (59), the codon-optimized S gene was  
433 synthesized, and cloned into pCAGGS vector. The SARS-CoV-2 S gene mutant without  
434 the furin cleavage site at the S1/S2 boundary was generated by an overlapping  
435 PCR-based method as previously described (60). The S1 subunit (aa 14-685) and RBD  
436 (aa 331-524) were cloned into a soluble protein expression vector, pSecTag2/Hygro-Ig  
437 vector, which contains human IgG Fc fragment and mouse Ig *k*-chain leader sequence  
438 (61). The protein expressed is soluble and has a human IgG-Fc tag.

#### 439 **Western blot assay**

440 As previously described, the expression of ACE2-C9, S1-Ig, and RBD-Ig fusion  
441 proteins were examined by western-blot (61). Briefly, lysates or culture supernatants of  
442 293T cells transfected with plasmid encoding ACE2 orthologs and S1-Ig or RBD-Ig  
443 were collected, boiled for 10 min, and then resolved by 4~12% SDS-PAGE. A PVDF  
444 membrane containing the proteins transferred from SDS-PAGE was blocked with  
445 blocking buffer (5% nonfat dry milk in TBS) for 1h at room temperature and probed  
446 with primary antibody overnight at 4 °C. The blot was washed three times with washing  
447 buffer (0.05% tween-20 in TBS), followed by incubation with secondary antibody for  
448 1h at room temperature. After three-time washes, the proteins bounded with antibodies

449 were imaged with the Li-Cor Odyssey system. (Li-Cor Biotechnology).

#### 450 **Immunoprecipitation (IP) assay.**

451 The association between Ig-fused S1 protein or RBD protein and ACE2 protein  
452 with C9 tag was measured by IP according to a previously described method (60).  
453 Briefly, HEK293T cells were transfected with plasmid encoding ACE2 with  
454 Lipofectamine 2000 (Invitrogen). 48 h post-transfection, the transfected 293T cells were  
455 harvested and lysed in PBS buffer containing 0.3 % *n*-decyl- $\beta$ -D-maltopyranoside  
456 (DDM, Anatrace). Cell lysates were incubated with Protein A/G PLUS Agarose (Santa  
457 Cruz, sc-2003) together with 4 $\mu$ g of S1-Ig or RBD-Ig. Protein A/G agarose were  
458 washed three times in TBS/1% Triton-X100, resolved by SDS-PAGE, and detected by  
459 western blot using anti-C9 monoclonal antibody.

#### 460 **Production of pseudotyped virus**

461 Following the standard protocol of calcium phosphate transfection, Lenti-X cells in  
462 10-cm plate were co-transfected by 20 $\mu$ g of HIV-luc and 10 $\mu$ g of CoVs spike gene  
463 plasmid. At 48h post-transfection, 15 ml supernatant was collected and passed through a  
464 0.45 $\mu$ m pore size PES filter. The purified virus was titrated with Lenti-X p24 Rapid  
465 Titer Assay (Takara Bio, Cat. No. 632200). The virus was stored at -80 °C for future  
466 use.

#### 467 **Virus entry assay**

468 Each well of 293T cells in a 96-well plate was transfected with 0.1 $\mu$ g of ACE2  
469 plasmid DNA following the standard protocol of Lipofectamine 2000 (Invitrogen). At  
470 48 hours post-transfection, 150  $\mu$ l of p24-normalized (10 ng) of pseudotype virus was  
471 added into each well and incubated at 37°C for 3 hours. The virus was then removed,

472 and 250  $\mu$ l of fresh medium was added into each well for further incubation. Two days  
473 post-infection, the medium was removed and the cells were lysed with 30  $\mu$ l/well of 1 $\times$   
474 cell lysis buffer (Promega) for 15 min, followed by adding 50  $\mu$ l/well of luciferase  
475 substrate (Promega). The firefly luciferase activities were measured by luminometry in  
476 a TopCounter (PerkinElmer). For each ACE2, four wells were tested in a single  
477 experiment, and at least three repeat experiments were carried out. The luciferase  
478 activity was expressed as relative light unit (RLU) and normalized to human ACE2 for  
479 plotting.

#### 480 **Syncytial formation assay**

481 293T cells with approximately 90% confluent on 12-well plate were transfected  
482 with 1.6 $\mu$ g of plasmid DNA encoding viral S gene or ACE2. At 24 h post-transfection,  
483 293T cells expressing the S protein were mixed at a 1:1 ratio with 293T cells expressing  
484 ACE2 and plated on 12-well plate. Multinucleated syncytia were observed 24 h after the  
485 cells were mixed.

#### 486 **Sequence analysis**

487 Multiple alignments of nucleotide or amino acid sequences of the spike gene of  
488 coronaviruses and ACE2 orthologs were performed using Clustal X (62). Phylogenetic  
489 tree was constructed based on the nucleotide sequences of animal ACE2 using the  
490 neighbor-joining algorithm implemented in MEGA X. The tree is drawn to scale with  
491 branch lengths in the same units as those of the evolutionary distances used to infer the  
492 phylogenetic tree. Evaluation of statistical confidence in nodes was based on 1000  
493 bootstrap replicates. Branches with <50% bootstrap value were collapsed. Platypus  
494 ACE2 (*Ornithorhynchus anatinus*, GenBank No. XM\_001515547) was used as an

495 outgroup.

496 **Homology-based structural modeling.**

497 Human ACE2 (PDB: 6VW1) in the bound conformation was extracted from the  
498 SARS-CoV-2 RBD/ hACE2 complex and used as a template for homology modeling  
499 (16). ACE2 Homology models were generated using the one-to-one threading algorithm  
500 of Phyre2 (63). The models were then aligned and compared to the intact SARS-CoV-2  
501 RBD/ ACE2 complex in PyMOL (The PyMOL Molecular Graphics System, Version 2.0  
502 Schrödinger, LLC).

503

504 **FUNDING**

505 This work was supported by grants from the National Natural Science Foundation of  
506 China (81772173 and 81971916) and National Science and Technology Mega-Project of  
507 China (2018ZX10301-408-002) to X Zhao and from the Canadian Institutes of Health  
508 Research (MOP-89903 to MSJ) and from the Scientific Research Common Program of  
509 Beijing Municipal Commission of Education (KM201910025003 to DY Chen) .

510

511

512

513

514

515

516

517

## References

518

- 519 1. **Zhu N, Zhang D, Wang W, Li X, Yang B, Song J, Zhao X, Huang B, Shi W, Lu R, Niu P,**  
520 **Zhan F, Ma X, Wang D, Xu W, Wu G, Gao GF, Tan W.** 2020. A Novel Coronavirus from  
521 Patients with Pneumonia in China, 2019. *The New England journal of medicine* **382**:727-733.
- 522 2. **Wu F, Zhao S, Yu B, Chen YM, Wang W, Song ZG, Hu Y, Tao ZW, Tian JH, Pei YY, Yuan**  
523 **ML, Zhang YL, Dai FH, Liu Y, Wang QM, Zheng JJ, Xu L, Holmes EC, Zhang YZ.** 2020.  
524 A new coronavirus associated with human respiratory disease in China. *Nature* **579**:265-269.
- 525 3. **Zhou P, Yang XL, Wang XG, Hu B, Zhang L, Zhang W, Si HR, Zhu Y, Li B, Huang CL,**  
526 **Chen HD, Chen J, Luo Y, Guo H, Jiang RD, Liu MQ, Chen Y, Shen XR, Wang X, Zheng**  
527 **XS, Zhao K, Chen QJ, Deng F, Liu LL, Yan B, Zhan FX, Wang YY, Xiao GF, Shi ZL.** 2020.  
528 A pneumonia outbreak associated with a new coronavirus of probable bat origin. *Nature*  
529 **579**:270-273.
- 530 4. **Lu R, Zhao X, Li J, Niu P, Yang B, Wu H, Wang W, Song H, Huang B, Zhu N, Bi Y, Ma X,**  
531 **Zhan F, Wang L, Hu T, Zhou H, Hu Z, Zhou W, Zhao L, Chen J, Meng Y, Wang J, Lin Y,**  
532 **Yuan J, Xie Z, Ma J, Liu WJ, Wang D, Xu W, Holmes EC, Gao GF, Wu G, Chen W, Shi W,**  
533 **Tan W.** 2020. Genomic characterisation and epidemiology of 2019 novel coronavirus:  
534 implications for virus origins and receptor binding. *Lancet* **395**:565-574.
- 535 5. **Zhou H, Chen X, Hu T, Li J, Song H, Liu Y, Wang P, Liu D, Yang J, Holmes EC, Hughes**  
536 **AC, Bi Y, Shi W.** 2020. A Novel Bat Coronavirus Closely Related to SARS-CoV-2 Contains  
537 Natural Insertions at the S1/S2 Cleavage Site of the Spike Protein. *Curr Biol* **30**:2196-2203  
538 e2193.
- 539 6. **Hayman DT.** 2016. Bats as Viral Reservoirs. *Annual review of virology* **3**:77-99.
- 540 7. **Cui J, Li F, Shi ZL.** 2019. Origin and evolution of pathogenic coronaviruses. *Nature reviews*  
541 *Microbiology* **17**:181-192.
- 542 8. **Xiao K, Zhai J, Feng Y, Zhou N, Zhang X, Zou JJ, Li N, Guo Y, Li X, Shen X, Zhang Z,**  
543 **Shu F, Huang W, Li Y, Zhang Z, Chen RA, Wu YJ, Peng SM, Huang M, Xie WJ, Cai QH,**  
544 **Hou FH, Chen W, Xiao L, Shen Y.** 2020. Isolation of SARS-CoV-2-related coronavirus from  
545 Malayan pangolins. *Nature* doi:10.1038/s41586-020-2313-x.
- 546 9. **Zhang T, Wu Q, Zhang Z.** 2020. Probable Pangolin Origin of SARS-CoV-2 Associated with  
547 the COVID-19 Outbreak. *Current biology* : CB  
548 doi:10.1016/j.cub.2020.03.022:S0960-9822(0920)30360-30362.
- 549 10. **Lam TT-Y, Shum MH-H, Zhu H-C, Tong Y-G, Ni X-B, Liao Y-S, Wei W, Cheung WY-M,**  
550 **Li W-J, Li L-F, Leung GM, Holmes EC, Hu Y-L, Guan Y.** 2020. Identifying SARS-CoV-2  
551 related coronaviruses in Malayan pangolins. *Nature* <https://doi.org/10.1101/2020.02.13.945485>.
- 552 11. **Liu P, Chen W, Chen JP.** 2019. Viral Metagenomics Revealed Sendai Virus and Coronavirus  
553 Infection of Malayan Pangolins (*Manis javanica*). *Viruses* **11**.
- 554 12. **Guan Y, Zheng BJ, He YQ, Liu XL, Zhuang ZX, Cheung CL, Luo SW, Li PH, Zhang LJ,**  
555 **Guan YJ, Butt KM, Wong KL, Chan KW, Lim W, Shortridge KF, Yuen KY, Peiris JS,**  
556 **Poon LL.** 2003. Isolation and characterization of viruses related to the SARS coronavirus from  
557 animals in southern China. *Science* **302**:276-278.



- 558 13. **Hemida MG, Chu DK, Poon LL, Perera RA, Alhammadi MA, Ng HY, Siu LY, Guan Y,**  
559 **Alnaeem A, Peiris M.** 2014. MERS coronavirus in dromedary camel herd, Saudi Arabia.  
560 *Emerging infectious diseases* **20**:1231-1234.
- 561 14. **Li F.** 2013. Receptor recognition and cross-species infections of SARS coronavirus. *Antiviral*  
562 *research* **100**:246-254.
- 563 15. **Hoffmann M, Kleine-Weber H, Schroeder S, Kruger N, Herrler T, Erichsen S, Schiergens**  
564 **TS, Herrler G, Wu NH, Nitsche A, Muller MA, Drosten C, Pohlmann S.** 2020. SARS-CoV-2  
565 Cell Entry Depends on ACE2 and TMPRSS2 and Is Blocked by a Clinically Proven Protease  
566 Inhibitor. *Cell* **10.1016/j.cell.2020.02.052**.
- 567 16. **Shang J, Ye G, Shi K, Wan Y, Luo C, Aihara H, Geng Q, Auerbach A, Li F.** 2020. Structural  
568 basis of receptor recognition by SARS-CoV-2. *Nature* **10.1038/s41586-020-2179-y**.
- 569 17. **Walls AC, Park YJ, Tortorici MA, Wall A, McGuire AT, Veasley D.** 2020. Structure, Function,  
570 and Antigenicity of the SARS-CoV-2 Spike Glycoprotein. *Cell* **10.1016/j.cell.2020.02.058**.
- 571 18. **Shang J, Wan Y, Luo C, Ye G, Geng Q, Auerbach A, Li F.** 2020. Cell entry mechanisms of  
572 SARS-CoV-2. *Proc Natl Acad Sci U S A* **117**:11727-11734.
- 573 19. **Bos EC, Heijnen L, Luytjes W, Spaan WJ.** 1995. Mutational analysis of the murine  
574 coronavirus spike protein: effect on cell-to-cell fusion. *Virology* **214**:453-463.
- 575 20. **de Haan CA, Stadler K, Godeke GJ, Bosch BJ, Rottier PJ.** 2004. Cleavage inhibition of the  
576 murine coronavirus spike protein by a furin-like enzyme affects cell-cell but not virus-cell fusion.  
577 *J Virol* **78**:6048-6054.
- 578 21. **Stauber R, Pfeleiderera M, Siddell S.** 1993. Proteolytic cleavage of the murine coronavirus  
579 surface glycoprotein is not required for fusion activity. *J Gen Virol* **74 ( Pt 2)**:183-191.
- 580 22. **Taguchi F.** 1993. Fusion formation by the uncleaved spike protein of murine coronavirus JHMV  
581 variant cl-2. *J Virol* **67**:1195-1202.
- 582 23. **Millet JK, Whittaker GR.** 2015. Host cell proteases: Critical determinants of coronavirus  
583 tropism and pathogenesis. *Virus research* **202**:120-134.
- 584 24. **Park JE, Li K, Barlan A, Fehr AR, Perlman S, McCray PB, Jr., Gallagher T.** 2016.  
585 Proteolytic processing of Middle East respiratory syndrome coronavirus spikes expands virus  
586 tropism. *Proc Natl Acad Sci U S A* **113**:12262-12267.
- 587 25. **Borucki MK, Allen JE, Chen-Harris H, Zemla A, Vanier G, Mabery S, Torres C, Hullinger**  
588 **P, Slezak T.** 2013. The role of viral population diversity in adaptation of bovine coronavirus to  
589 new host environments. *PloS one* **8**:e52752.
- 590 26. **Millet JK, Whittaker GR.** 2014. Host cell entry of Middle East respiratory syndrome  
591 coronavirus after two-step, furin-mediated activation of the spike protein. *Proc Natl Acad Sci U*  
592 *S A* **111**:15214-15219.
- 593 27. **Ito T, Goto H, Yamamoto E, Tanaka H, Takeuchi M, Kuwayama M, Kawaoka Y, Otsuki K.**  
594 2001. Generation of a highly pathogenic avian influenza A virus from an avirulent field isolate  
595 by passaging in chickens. *Journal of virology* **75**:4439-4443.
- 596 28. **Gallagher TM, Buchmeier MJ.** 2001. Coronavirus spike proteins in viral entry and  
597 pathogenesis. *Virology* **279**:371-374.
- 598 29. **Letko M, Marzi A, Munster V.** 2020. Functional assessment of cell entry and receptor usage for  
599 SARS-CoV-2 and other lineage B betacoronaviruses. *Nature microbiology*  
600 **10.1038/s41564-020-0688-y**.
- 601 30. **Li W, Moore MJ, Vasilieva N, Sui J, Wong SK, Berne MA, Somasundaran M, Sullivan JL,**  
602 **Luzuriaga K, Greenough TC, Choe H, Farzan M.** 2003. Angiotensin-converting enzyme 2 is

- 603 a functional receptor for the SARS coronavirus. *Nature* **426**:450-454.
- 604 31. **Chen D, Hou Z, Jiang D, Zheng M, Li G, Zhang Y, Li R, Lin H, Chang J, Zeng H, Guo JT,**  
605 **Zhao X.** 2019. GILT restricts the cellular entry mediated by the envelope glycoproteins of  
606 SARS-CoV, Ebola virus and Lassa fever virus. *Emerging microbes & infections* **8**:1511-1523.
- 607 32. **Zhao X, Sehgal M, Hou Z, Cheng J, Shu S, Wu S, Guo F, Le Marchand SJ, Lin H, Chang J,**  
608 **Guo JT.** 2018. Identification of Residues Controlling Restriction versus Enhancing Activities of  
609 IFITM Proteins on Entry of Human Coronaviruses. *Journal of virology* **92**.
- 610 33. **Hoffmann M, Kleine-Weber H, Pohlmann S.** 2020. A Multibasic Cleavage Site in the Spike  
611 Protein of SARS-CoV-2 Is Essential for Infection of Human Lung Cells. *Mol Cell* **78**:779-784  
612 e775.
- 613 34. **Lan J, Ge J, Yu J, Shan S, Zhou H, Fan S, Zhang Q, Shi X, Wang Q, Zhang L, Wang X.**  
614 2020. Structure of the SARS-CoV-2 spike receptor-binding domain bound to the ACE2 receptor.  
615 *Nature* **581**:215-220.
- 616 35. **Yan R, Zhang Y, Li Y, Xia L, Guo Y, Zhou Q.** 2020. Structural basis for the recognition of the  
617 SARS-CoV-2 by full-length human ACE2. *Science* **10.1126/science.abb2762**.
- 618 36. **Li F, Li W, Farzan M, Harrison SC.** 2005. Structure of SARS coronavirus spike  
619 receptor-binding domain complexed with receptor. *Science* **309**:1864-1868.
- 620 37. **Li W, Zhang C, Sui J, Kuhn JH, Moore MJ, Luo S, Wong SK, Huang IC, Xu K, Vasilieva N,**  
621 **Murakami A, He Y, Marasco WA, Guan Y, Choe H, Farzan M.** 2005. Receptor and viral  
622 determinants of SARS-coronavirus adaptation to human ACE2. *EMBO J* **24**:1634-1643.
- 623 38. **Li F.** 2016. Structure, Function, and Evolution of Coronavirus Spike Proteins. *Annual review of*  
624 *virology* **3**:237-261.
- 625 39. **Perlman S, Netland J.** 2009. Coronaviruses post-SARS: update on replication and pathogenesis.  
626 *Nature reviews Microbiology* **7**:439-450.
- 627 40. **Munster VJ, Feldmann F, Williamson BN, van Doremalen N, Perez-Perez L, Schulz J,**  
628 **Meade-White K, Okumura A, Callison J, Brumbaugh B, Avanzato VA, Rosenke R, Hanley**  
629 **PW, Saturday G, Scott D, Fischer ER, de Wit E.** 2020. Respiratory disease in rhesus  
630 macaques inoculated with SARS-CoV-2. *Nature* doi:10.1038/s41586-020-2324-7.
- 631 41. **Shi J, Wen Z, Zhong G, Yang H, Wang C, Huang B, Liu R, He X, Shuai L, Sun Z, Zhao Y,**  
632 **Liu P, Liang L, Cui P, Wang J, Zhang X, Guan Y, Tan W, Wu G, Chen H, Bu Z.** 2020.  
633 Susceptibility of ferrets, cats, dogs, and other domesticated animals to SARS-coronavirus 2.  
634 *Science* **368**:1016-1020.
- 635 42. **Qiang Zhang HZ, Kun Huang, Yong Yang, Xianfeng Hui, Jindong Gao, Xinglin He,**  
636 **Chengfei Li, Wenxiao Gong, Yufei Zhang, Cheng Peng, Xiaoxiao Gao, Huanchun Chen,**  
637 **Zhong Zou, Zhengli Shi, Meilin Jin.** 2020. SARS-CoV-2 neutralizing serum antibodies in cats:  
638 a serological investigation. *BioRxiv* doi: <https://doi.org/10.1101/2020.04.01.021196>.
- 639 43. **Martina BE, Haagmans BL, Kuiken T, Fouchier RA, Rimmelzwaan GF, Van Amerongen G,**  
640 **Peiris JS, Lim W, Osterhaus AD.** 2003. *Virology: SARS virus infection of cats and ferrets.*  
641 *Nature* **425**:915.
- 642 44. **Qin C, Wang J, Wei Q, She M, Marasco WA, Jiang H, Tu X, Zhu H, Ren L, Gao H, Guo L,**  
643 **Huang L, Yang R, Cong Z, Wang Y, Liu Y, Sun Y, Duan S, Qu J, Chen L, Tong W, Ruan L,**  
644 **Liu P, Zhang H, Zhang J, Liu D, Liu Q, Hong T, He W.** 2005. An animal model of SARS  
645 produced by infection of *Macaca mulatta* with SARS coronavirus. *J Pathol* **206**:251-259.
- 646 45. **Rowe T, Gao G, Hogan RJ, Crystal RG, Voss TG, Grant RL, Bell P, Kobinger GP, Wivel**  
647 **NA, Wilson JM.** 2004. Macaque model for severe acute respiratory syndrome. *J Virol*

- 648                   78:11401-11404.
- 649   46.   **Roberts A, Lamirande EW, Vogel L, Jackson JP, Paddock CD, Guarner J, Zaki SR,**  
650   **Sheahan T, Baric R, Subbarao K.** 2008. Animal models and vaccines for SARS-CoV infection.  
651   Virus research **133**:20-32.
- 652   47.   **Follis KE, York J, Nunberg JH.** 2006. Furin cleavage of the SARS coronavirus spike  
653   glycoprotein enhances cell-cell fusion but does not affect virion entry. *Virology* **350**:358-369.
- 654   48.   **Thomas HC Sit CJB, Sin Ming Ip, Karina WS Tam, Pierra YT Law, Esther MW To,**  
655   **Veronica YT Yu, Leslie D Sims, Dominic NC Tsang, Daniel KW Chu, Ranawaka APM**  
656   **Perera, Leo LM Poon, Malik Peiris.** 2020. Canine SARS-CoV-2 infection. Research Square  
657   DOI:10.21203/rs.3.rs-18713/v1.
- 658   49.   **Lun ZR, Qu LH.** 2004. Animal-to-human SARS-associated coronavirus transmission?  
659   Emerging infectious diseases **10**:959.
- 660   50.   **Safronetz D, Geisbert TW, Feldmann H.** 2013. Animal models for highly pathogenic emerging  
661   viruses. *Current opinion in virology* **3**:205-209.
- 662   51.   **Bao L, Deng W, Huang B, Gao H, Liu J, Ren L, Wei Q, Yu P, Xu Y, Qi F, Qu Y, Li F, Lv Q,**  
663   **Wang W, Xue J, Gong S, Liu M, Wang G, Wang S, Song Z, Zhao L, Liu P, Zhao L, Ye F,**  
664   **Wang H, Zhou W, Zhu N, Zhen W, Yu H, Zhang X, Guo L, Chen L, Wang C, Wang Y,**  
665   **Wang X, Xiao Y, Sun Q, Liu H, Zhu F, Ma C, Yan L, Yang M, Han J, Xu W, Tan W, Peng X,**  
666   **Jin Q, Wu G, Qin C.** 2020. The pathogenicity of SARS-CoV-2 in hACE2 transgenic mice.  
667   Nature doi:10.1038/s41586-020-2312-y.
- 668   52.   **McCray PB, Jr., Pewe L, Wohlford-Lenane C, Hickey M, Manzel L, Shi L, Netland J, Jia**  
669   **HP, Halabi C, Sigmund CD, Meyerholz DK, Kirby P, Look DC, Perlman S.** 2007. Lethal  
670   infection of K18-hACE2 mice infected with severe acute respiratory syndrome coronavirus.  
671   *Journal of virology* **81**:813-821.
- 672   53.   **Huang C, Wang Y, Li X, Ren L, Zhao J, Hu Y, Zhang L, Fan G, Xu J, Gu X, Cheng Z, Yu T,**  
673   **Xia J, Wei Y, Wu W, Xie X, Yin W, Li H, Liu M, Xiao Y, Gao H, Guo L, Xie J, Wang G,**  
674   **Jiang R, Gao Z, Jin Q, Wang J, Cao B.** 2020. Clinical features of patients infected with 2019  
675   novel coronavirus in Wuhan, China. *Lancet* **10.1016/S0140-6736(20)30183-5**.
- 676   54.   **Callaway E.** 2020. Labs rush to study coronavirus in transgenic animals - some are in short  
677   supply. *Nature* **579**:183.
- 678   55.   **Day CW, Baric R, Cai SX, Frieman M, Kumaki Y, Morrey JD, Smee DF, Barnard DL.**  
679   2009. A new mouse-adapted strain of SARS-CoV as a lethal model for evaluating antiviral  
680   agents in vitro and in vivo. *Virology* **395**:210-222.
- 681   56.   **Roberts A, Deming D, Paddock CD, Cheng A, Yount B, Vogel L, Herman BD, Sheahan T,**  
682   **Heise M, Genrich GL, Zaki SR, Baric R, Subbarao K.** 2007. A mouse-adapted  
683   SARS-coronavirus causes disease and mortality in BALB/c mice. *PLoS pathogens* **3**:e5.
- 684   57.   **Jiang D, Guo H, Xu C, Chang J, Gu B, Wang L, Block TM, Guo JT.** 2008. Identification of  
685   three interferon-inducible cellular enzymes that inhibit the replication of hepatitis C virus. *J Virol*  
686   **82**:1665-1678.
- 687   58.   **Li W, Greenough TC, Moore MJ, Vasilieva N, Somasundaran M, Sullivan JL, Farzan M,**  
688   **Choe H.** 2004. Efficient replication of severe acute respiratory syndrome coronavirus in mouse  
689   cells is limited by murine angiotensin-converting enzyme 2. *J Virol* **78**:11429-11433.
- 690   59.   **Babcock GJ, Eshaki DJ, Thomas WD, Jr., Ambrosino DM.** 2004. Amino acids 270 to 510 of  
691   the severe acute respiratory syndrome coronavirus spike protein are required for interaction with  
692   receptor. *J Virol* **78**:4552-4560.

- 693 60. **Lin HX, Feng Y, Wong G, Wang L, Li B, Zhao X, Li Y, Smaill F, Zhang C.** 2008.  
694 Identification of residues in the receptor-binding domain (RBD) of the spike protein of human  
695 coronavirus NL63 that are critical for the RBD-ACE2 receptor interaction. *The Journal of*  
696 *general virology* **89**:1015-1024.
- 697 61. **Lin HX, Feng Y, Wong G, Wang L, Li B, Zhao X, Li Y, Smaill F, Zhang C.** 2008.  
698 Identification of residues in the receptor-binding domain (RBD) of the spike protein of human  
699 coronavirus NL63 that are critical for the RBD-ACE2 receptor interaction. *J Gen Virol*  
700 **89**:1015-1024.
- 701 62. **Thompson JD, Higgins DG, Gibson TJ.** 1994. CLUSTAL W: improving the sensitivity of  
702 progressive multiple sequence alignment through sequence weighting, position-specific gap  
703 penalties and weight matrix choice. *Nucleic Acids Res* **22**:4673-4680.
- 704 63. **Kelley LA, Mezulis S, Yates CM, Wass MN, Sternberg MJ.** 2015. The Phyre2 web portal for  
705 protein modeling, prediction and analysis. *Nature protocols* **10**:845-858.
- 706
- 707
- 708
- 709
- 710
- 711
- 712
- 713
- 714
- 715
- 716
- 717
- 718
- 719
- 720

721 **Figure and Figure legends**

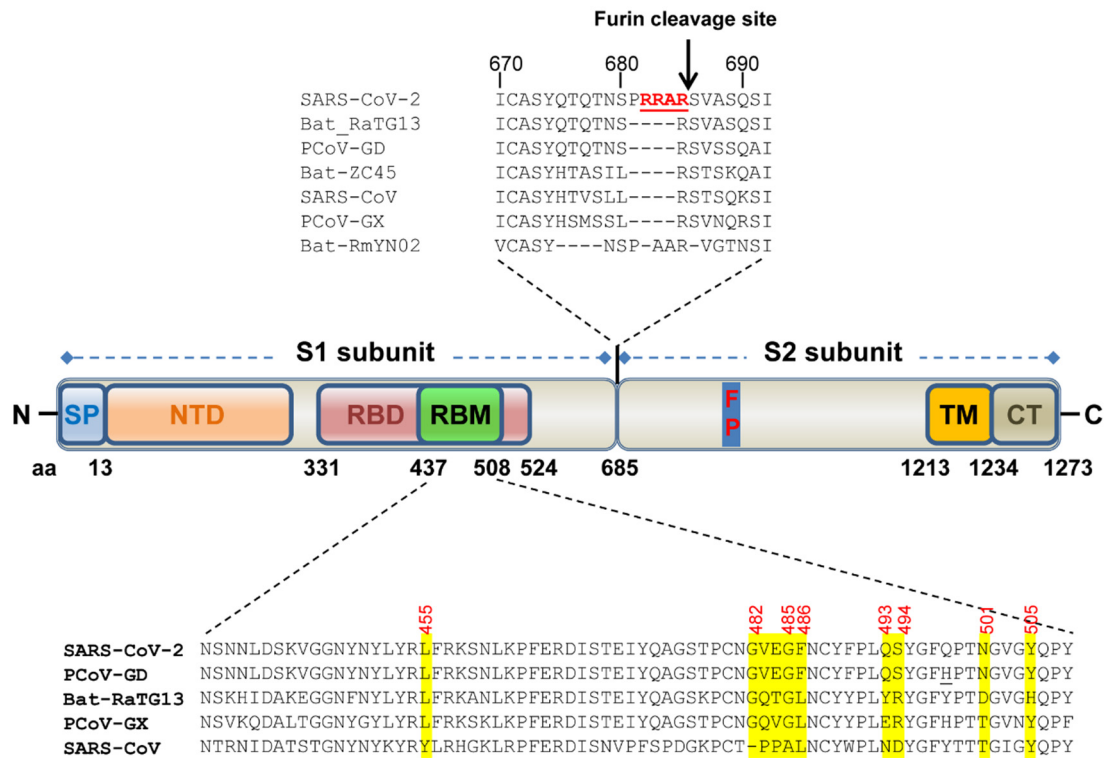

722

723

724 **Fig. 1. Schematic diagram of domain structures and critical ACE2-binding**  
725 **residues of the spike (S) protein of SARS-CoV-2.** SP: signal peptide. NTD: N-  
726 terminal domain. RBD: receptor-binding domain. RBM: receptor-binding motif. FP:  
727 fusion peptide. TM: transmembrane domain. CT: cytoplasmic tail. The S protein is  
728 cleaved into S1 and S2 subunit during biogenesis at the polybasic furin cleavage site  
729 (RRAR↓), which is not present in SARS-CoV and other animal SARS-CoV-2-like  
730 CoVs. The S1 subunit is required for binding to ACE2 receptor, while the S2 subunit  
731 containing a FP mediates membrane fusion. In SARS-CoV-2, the S1 contains NTD and  
732 an independently folded domain known as RBD, which harbors a region called receptor  
733 binding motif (RBM), that are primarily in contact with receptor. The most critical  
734 hACE2-binding residues in the RBM of several SARS-CoV-2-related CoVs are  
735 highlighted in yellow and referred from the crystal structure of RBD-hACE2 complex  
736 (Shang et al, Nature). PCoV-GX: pangolin CoV isolate GX-PL4. PCoV-GD: pangolin  
737 CoV isolate MP789. The only difference in the RBM between PCoV-GD and  
738 SARS-CoV-2 is Q498H (underlined). The GenBank No. for these CoVs is:  
739 SARS-CoV-2 (isolate Wuhan-Hu-1, MN908947), SARS-CoV (isolate Tor2,  
740 NC\_004718.3), bat-ZC45 (MG772933.1), bat-RaTG13 (MN996532.1), PCoV-GX  
741 (isolate P4L, MT040333.1), PCoV-GD (isolate MP789, MT084071.1).

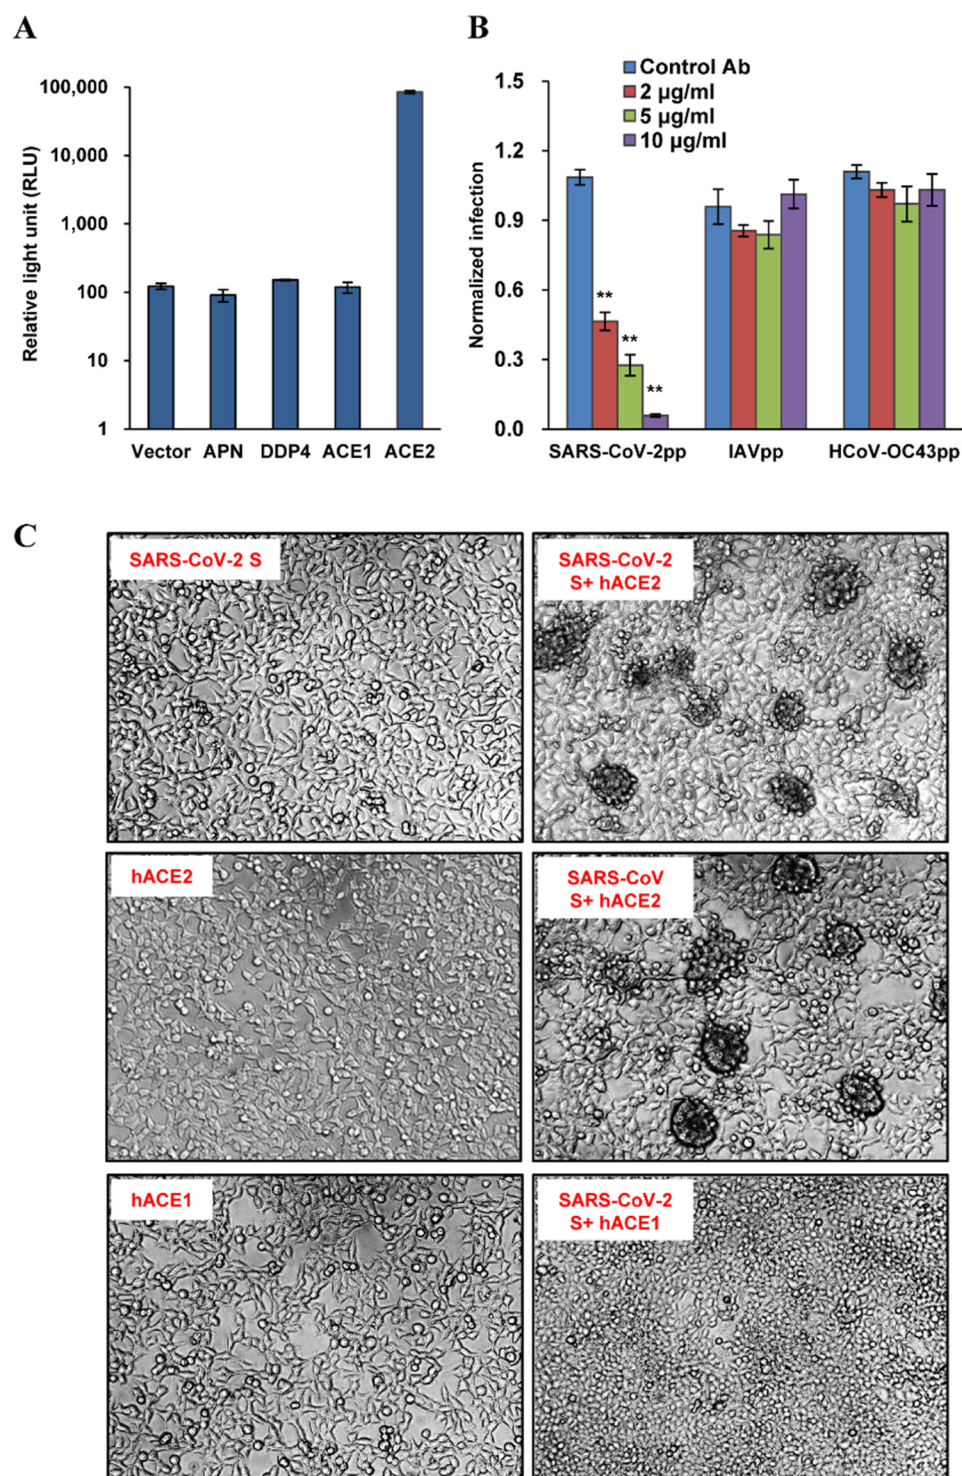

742

743 **Fig. 2. Human ACE2 served as receptor for SARS-CoV-2.** (A) ACE2 supported  
744 HIV-Luc-based pseudotyped virus entry. 293T cells were transfected with empty vector  
745 pcDNA3.1, APN (receptor for HCoV-229E), DDP4 (receptor for MERS-CoV), ACE1  
746 or ACE2. At 48 h post transfection, the cells were infected by SARS-CoV-2 S protein  
747 pseudotyped virus (SARS-CoV-2pp). At 48 h post infection, luciferase activity was  
748 measured. (B) Human ACE2 antibody inhibited virus entry at a dose-dependent manner.

749 293T cells were transfected with ACE2. At 48 h post transfection, the cells were  
750 pre-incubated with indicated concentration of hACE2 antibody or control antibody  
751 (anti-IDE) for 1 h, and then infected by pseudotyped virus of SARS-CoV-2, Influenza  
752 virus A (IAVpp) or human coronavirus (HCoV) OC43 (HCoV-OC43pp) in the presence  
753 of indicated concentration of hACE2 antibody or control antibody (anti-IDE) for  
754 another 3 h, then the virus and antibodies were removed. At 48 h post infection,  
755 luciferase activity was measured and normalized to the control antibody for  
756 SARS-CoV-2pp. Error bars reveal the standard deviation of the means from four  
757 biological repeats. (C) Syncytia formation assay. 293T cells transfected with a plasmid  
758 the expressing S protein of SARS-CoV-2 or SARS-CoV were mixed at a 1:1 ratio with  
759 those cells transfected with a plasmid expressing ACE1 or ACE2. Twenty-four hours  
760 later, syncytia formation was recorded.

761

762

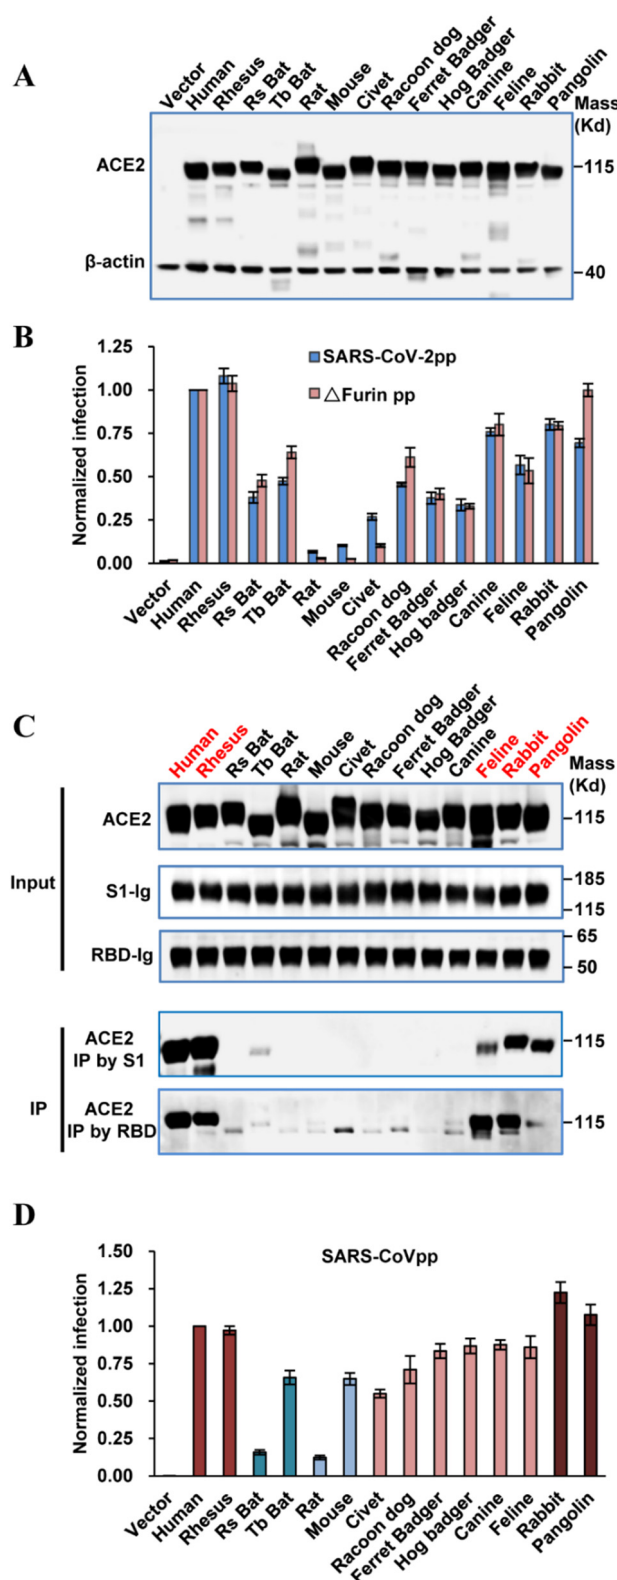

763

764 **Fig. 3. Multiple ACE2 orthologues served as receptors for SARS-CoV-2.** (A)  
 765 Transient expression of ACE2 orthologues in 293T cells. The cell lysates were detected by  
 766 western blot assay, using an anti-C9 monoclonal antibody. (B) HIV-Luc-based  
 767 pseudotyped virus entry. 293T cells were transfected with ACE2s orthologues. At 48 h  
 768 post transfection, the cells were infected by the pseudotyped virus of wildtype



769 SARS-CoV-2 or mutant  $\Delta$ Furin. At 48 h post infection, luciferase activity was measured  
770 and normalized to human ACE2, respectively. Error bars reveal the standard deviation  
771 of the means from four biological repeats. (C) IP assay. The upper panel showed the  
772 input of ACE2 protein with C9 tag, S1 and RBD with IgG tag. The lower panel showed  
773 the ACE2 pulled down by S1-Ig or RBD-Ig fusion protein. (D) SARS-CoV  
774 spike-mediated entry. 293T cells were transfected with ACE2s orthologs. At 48 h post  
775 transfection, the cells were infected by the pseudotyped virus of SARS-CoV. At 48 h  
776 post infection, luciferase activity was measured and normalized to human ACE2,  
777 respectively. Error bars reveal the standard deviation of the means from four biological  
778 repeats.  
779

780

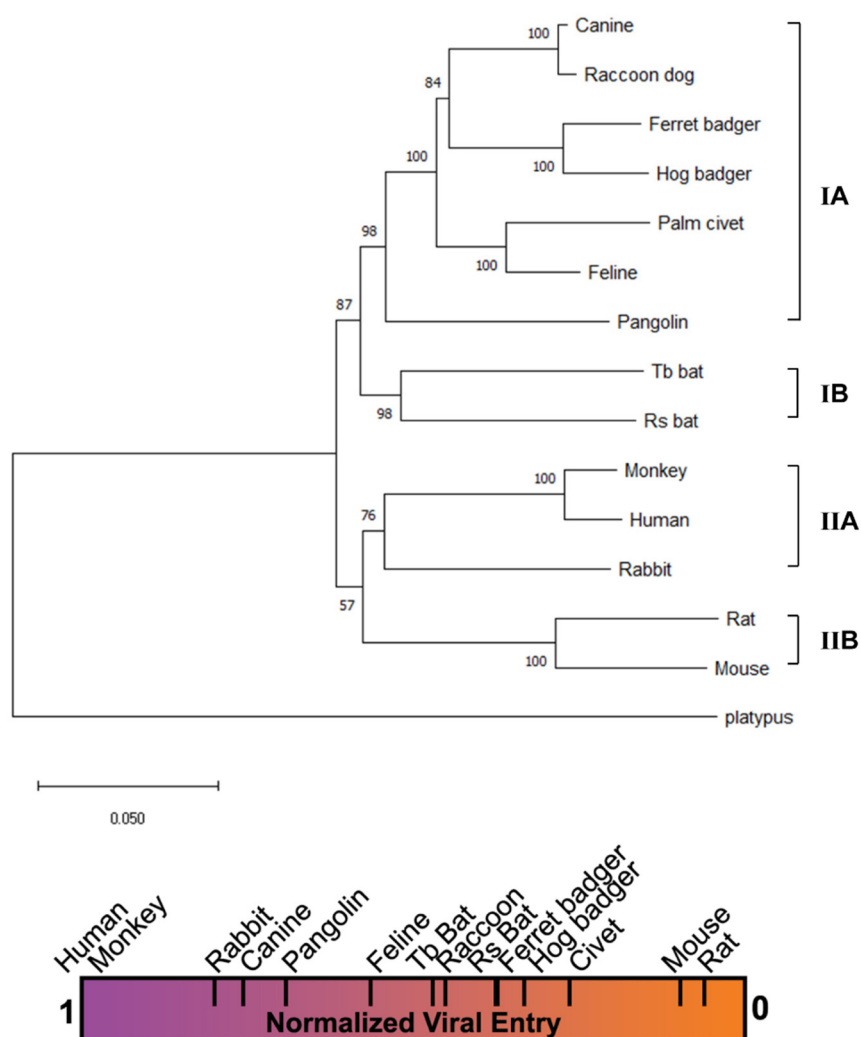

781

782

783 **Fig. 4. Phylogenetic clustering of ACE2s correlates with their receptor activities.**

784 **Upper panel:** phylogram tree of 14 ACE2s. The tree was constructed based on  
 785 nucleotide sequences using the Neighbor-joining method implemented in program  
 786 MEGA X. The percentage of replicate trees in which the associated taxa clustered  
 787 together in the bootstrap test (1000 replicates) are shown next to the branches. The tree  
 788 was rooted by ACE2 of platypus (*Ornithorhynchus anatinus*). The taxonomic orders  
 789 where these animals are classified are shown on the right-hand side of the tree. **Lower**  
 790 **panel:** a heat bar summarizing the relative levels of pseudotyped virus entry supported  
 791 by different animal ACE2s.

792

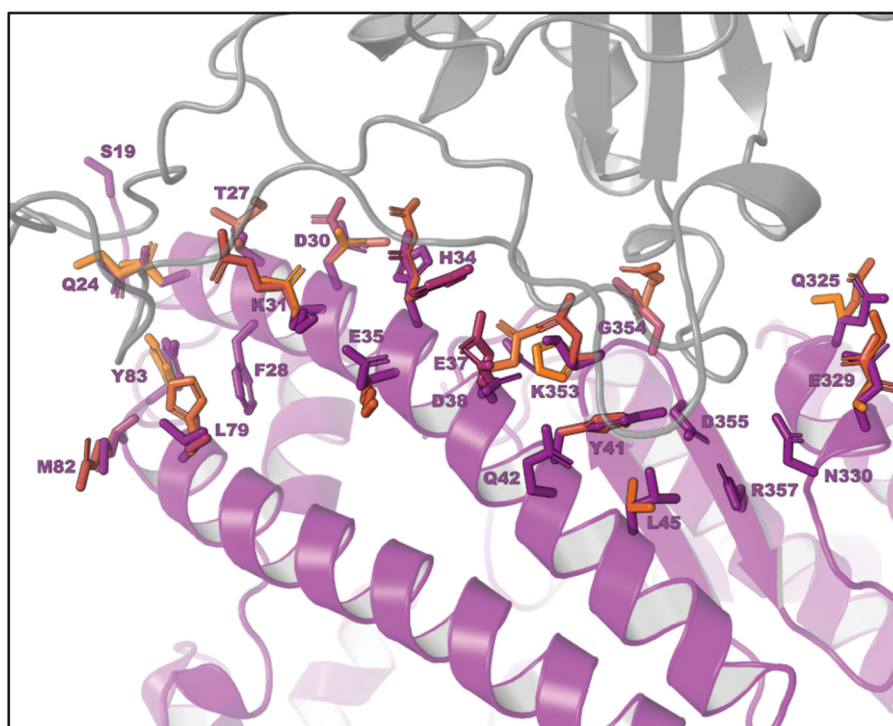

| ACE2          | 19 | 24 | 27 | 28 | 30 | 31 | 34 | 35 | 37 | 38 | 41 | 42 | 45 | 79 | 82 | 83 | 325 | 329 | 330 | 353 | 354 | 355 | 357 |
|---------------|----|----|----|----|----|----|----|----|----|----|----|----|----|----|----|----|-----|-----|-----|-----|-----|-----|-----|
| Human         | S  | Q  | T  | F  | D  | K  | H  | E  | E  | D  | Y  | Q  | L  | L  | M  | Y  | Q   | E   | N   | K   | G   | D   | R   |
| Monkey        | -  | -  | -  | -  | -  | -  | -  | -  | -  | -  | -  | -  | -  | -  | -  | -  | -   | -   | -   | -   | -   | -   | -   |
| Rs bat        | -  | E  | M  | -  | -  | -  | T  | K  | -  | -  | H  | -  | -  | -  | N  | -  | E   | N   | -   | -   | -   | -   | -   |
| Tb bat        | -  | E  | I  | -  | Q  | R  | T  | -  | -  | E  | H  | -  | -  | H  | R  | -  | -   | N   | -   | -   | -   | -   | -   |
| Rat           | -  | K  | S  | -  | N  | -  | Q  | -  | -  | -  | -  | -  | -  | I  | N  | F  | P   | T   | -   | H   | -   | -   | -   |
| Mouse         | -  | N  | -  | -  | N  | N  | Q  | -  | -  | -  | -  | -  | -  | T  | S  | F  | -   | A   | -   | H   | -   | -   | -   |
| Civet         | -  | L  | -  | -  | E  | T  | Y  | -  | Q  | E  | -  | -  | V  | -  | T  | -  | -   | -   | -   | -   | -   | D   | -   |
| Raccoon       | -  | L  | -  | -  | E  | -  | Y  | -  | -  | E  | -  | -  | -  | -  | T  | -  | -   | -   | -   | R   | -   | -   | -   |
| Ferret badger | -  | L  | -  | -  | E  | -  | -  | -  | -  | E  | -  | -  | H  | T  | -  | E  | Q   | -   | -   | R   | -   | -   | -   |
| Hog badger    | -  | L  | -  | -  | E  | -  | R  | -  | -  | E  | -  | -  | H  | T  | -  | E  | K   | -   | -   | H   | -   | -   | -   |
| Canine        | -  | L  | -  | -  | E  | -  | Y  | -  | -  | E  | -  | -  | -  | T  | -  | -  | -   | -   | -   | -   | -   | -   | -   |
| Feline        | -  | L  | -  | -  | E  | -  | -  | -  | -  | E  | -  | -  | -  | T  | -  | -  | -   | -   | -   | -   | -   | -   | -   |
| Rabbit        | -  | L  | -  | -  | E  | -  | Q  | -  | -  | -  | -  | -  | -  | T  | -  | -  | -   | -   | -   | -   | -   | -   | -   |
| Pangolin      | -  | E  | -  | -  | E  | -  | S  | -  | -  | E  | -  | -  | I  | N  | -  | -  | -   | -   | -   | -   | H   | -   | -   |

793

794

795 **Fig. 5. Critical RBD-binding residues in ACE2 orthologs.** Upper panel: 23  
 796 RBD-binding residues at the contact interface between hACE2 and RBD of  
 797 SARS-CoV-2. Human ACE2 (PDB: 6VW1) in the bound conformation was extracted  
 798 from the SARS-CoV-2 RBD/ACE2 complex and used as a template for homology  
 799 modeling (16). Low panel: Critical RBD-binding residues in ACE2 orthologs. Residue  
 800 substitutions highlighted in red and orange are those unique to both mouse and rat  
 801 ACE2s and both bats, respectively. The rest of residue substitutions are highlighted in  
 802 yellow.

803

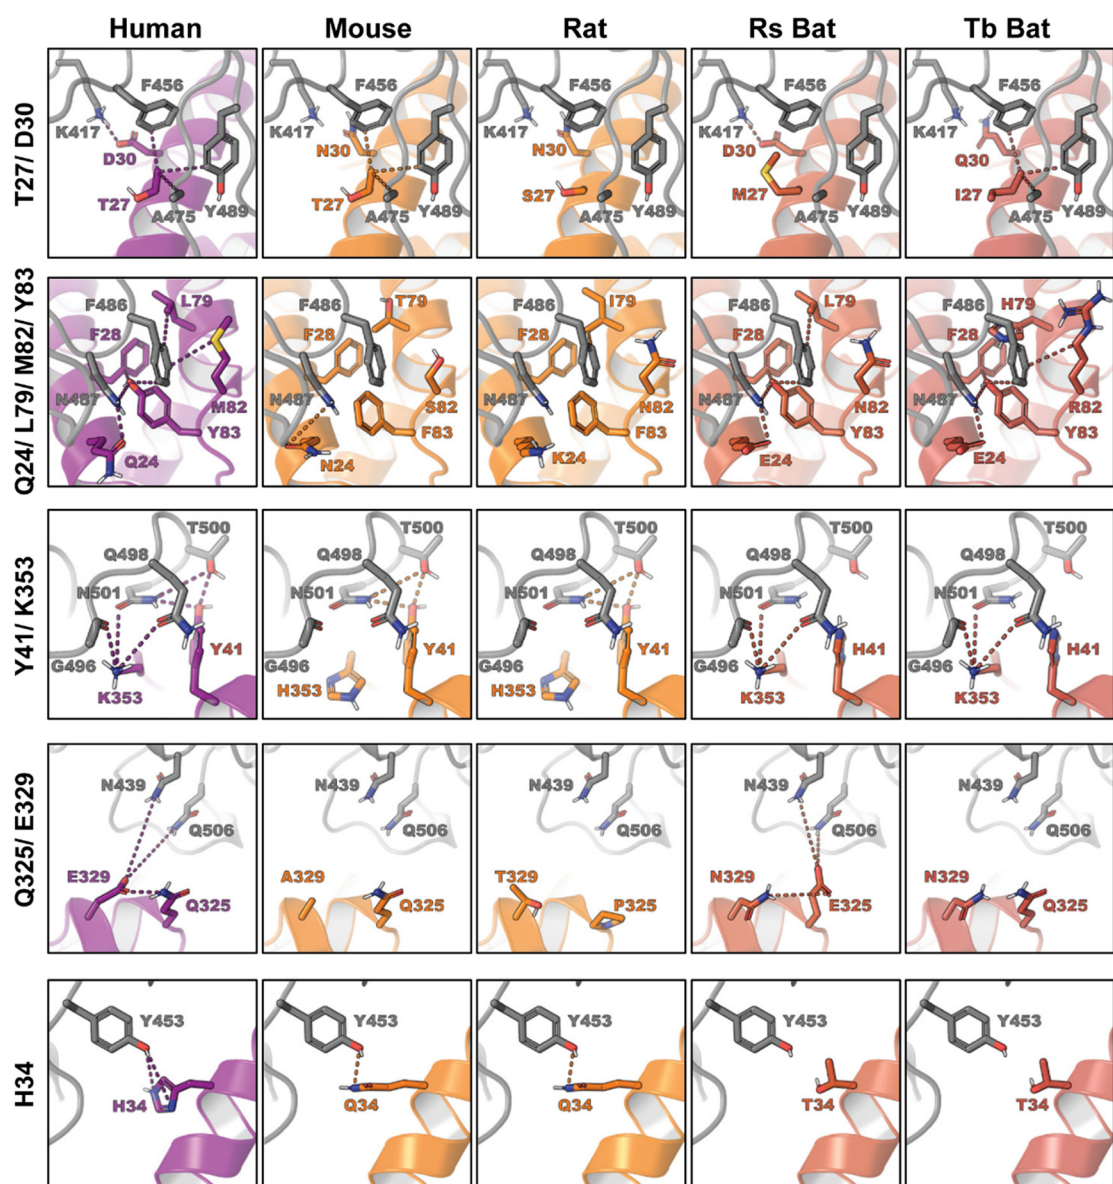

804

805

806 **Fig. 6. Structural models of key residue substitutions in ACE2 of mouse, rat and**  
807 **bats.** Human ACE2 (PDB: 6VW1) in the bound conformation was extracted from the  
808 SARS-CoV-2 RBD/ACE2 complex and used as a template for homology modeling  
809 (16). ACE2 Homology models were generated using the one-to-one threading algorithm  
810 of Phyre2 (63). The models were then aligned and compared to the intact SARS-CoV-2  
811 RBD/ ACE2 complex in PyMOL.

812

813

814 **Table 1.** Predicted effect of critical residue substitutions in ACE2 orthologs on the  
 815 interaction with RBD of SARS-CoV-2

816

| Human ACE2 |         | Interaction |         |             | Predicted status of interaction in ACE2 homologs (Disrupted/Enhanced/Tolerated/Unsure/No residue change) |      |       |     |       |       |         |        |           |     |     |        |          |   |
|------------|---------|-------------|---------|-------------|----------------------------------------------------------------------------------------------------------|------|-------|-----|-------|-------|---------|--------|-----------|-----|-----|--------|----------|---|
| Index      | Residue | Molecule    | Residue | Type        | Monkey                                                                                                   | BaRs | BatTb | Rat | Mouse | Givet | Raccoon | Ferret | HogBadger | Dog | Cat | Rabbit | Pangolin |   |
| 19         | S       | ACE2        | Q24     | H-bond      | -                                                                                                        | -    | -     | -   | -     | -     | -       | -      | -         | -   | -   | -      | -        |   |
| 24         | Q       | RBD         | N487    | H-bond      | -                                                                                                        | T    | T     | D   | T     | D     | D       | D      | D         | D   | D   | D      | T        |   |
|            |         | ACE2        | S12     | H-bond      | -                                                                                                        | D    | D     | T   | T     | D     | D       | D      | D         | D   | D   | D      | D        |   |
| 27         | T       | RBD         | Y489    | VdW         | -                                                                                                        | D    | T     | D   | -     | -     | -       | -      | -         | -   | -   | -      | -        |   |
|            |         | RBD         | A475    | VdW         | -                                                                                                        | D    | T     | D   | -     | -     | -       | -      | -         | -   | -   | -      | -        |   |
|            |         | RBD         | F456    | VdW         | -                                                                                                        | D    | T     | D   | -     | -     | -       | -      | -         | -   | -   | -      | -        | - |
|            |         | ACE2        | Y83     | π           | -                                                                                                        | -    | -     | -   | -     | -     | -       | -      | -         | -   | -   | -      | -        | - |
| 30         | D       | RBD         | K417    | H-bond      | -                                                                                                        | -    | D     | D   | D     | T     | T       | T      | T         | T   | T   | T      | T        |   |
| 31         | K       | RBD         | Q493    | H-bond      | -                                                                                                        | -    | T     | -   | D     | D     | -       | -      | -         | -   | -   | -      | -        |   |
| 34         | H       | RBD         | Y453    | H-bond      | -                                                                                                        | D    | D     | T   | T     | D     | D       | -      | T         | D   | -   | T      | D        |   |
| 35         | E       | RBD         | Q493    | H-bond      | -                                                                                                        | -    | -     | -   | -     | -     | -       | -      | -         | -   | -   | -      | -        |   |
| 37         | E       | ACE2        | R393    | H-bond      | -                                                                                                        | -    | -     | -   | -     | D     | -       | -      | -         | -   | -   | -      | -        |   |
|            |         | RBD         | Y505    | VdW         | -                                                                                                        | -    | -     | -   | -     | E     | -       | -      | -         | -   | -   | -      | -        |   |
| 38         | D       | ACE2        | Q42     | H-bond      | -                                                                                                        | -    | -     | -   | -     | T     | T       | T      | T         | T   | T   | T      | T        |   |
|            |         | ACE2        | K353    | H-bond      | -                                                                                                        | -    | -     | -   | -     | T     | T       | T      | T         | T   | T   | T      | T        |   |
|            |         | RBD         | Q498    | H-bond      | -                                                                                                        | -    | -     | -   | -     | T     | T       | T      | T         | T   | T   | T      | T        |   |
|            |         | RBD         | Y449    | VdW         | -                                                                                                        | -    | -     | -   | -     | T     | T       | T      | T         | T   | T   | T      | T        |   |
| 41         | Y       | RBD         | Q498    | π           | -                                                                                                        | D    | D     | -   | -     | -     | -       | -      | -         | -   | -   | -      | -        |   |
|            |         | RBD         | T500    | VdW         | -                                                                                                        | D    | D     | -   | -     | -     | -       | -      | -         | -   | -   | -      | -        |   |
|            |         | RBD         | N501    | H-bond      | -                                                                                                        | D    | D     | -   | -     | -     | -       | -      | -         | -   | -   | -      | -        |   |
|            |         | ACE2        | R357    | H-bond      | -                                                                                                        | D    | D     | -   | -     | -     | -       | -      | -         | -   | -   | -      | -        |   |
|            |         | ACE2        | K353    | π           | -                                                                                                        | D    | D     | -   | -     | -     | -       | -      | -         | -   | -   | -      | -        |   |
| 42         | Q       | RBD         | Y449    | H-bond      | -                                                                                                        | -    | -     | -   | -     | -     | -       | -      | -         | -   | -   | -      | -        |   |
|            |         | ACE2        | D38     | H-bond      | -                                                                                                        | -    | -     | -   | -     | -     | -       | -      | -         | -   | -   | -      | -        |   |
| 45         | L       | RBD         | Q498    | VdW         | -                                                                                                        | -    | -     | -   | -     | T     | -       | -      | -         | -   | -   | -      | -        |   |
| 79         | L       | RBD         | F486    | Hydrophobic | -                                                                                                        | -    | D     | T   | D     | -     | -       | D      | D         | -   | -   | -      | T        |   |
| 82         | M       | RBD         | F486    | π           | -                                                                                                        | D    | U     | D   | D     | D     | D       | D      | D         | D   | D   | D      | D        |   |
| 83         | Y       | RBD         | F486    | π           | -                                                                                                        | -    | -     | D   | D     | -     | -       | -      | -         | -   | -   | -      | -        |   |
|            |         | RBD         | N487    | H-bond      | -                                                                                                        | -    | -     | D   | D     | -     | -       | -      | -         | -   | -   | -      | -        |   |
|            |         | ACE2        | F28     | π           | -                                                                                                        | -    | -     | D   | D     | -     | -       | -      | -         | -   | -   | -      | -        |   |
| 325        | Q       | ACE2        | E329    | H-bond      | -                                                                                                        | T    | D     | D   | D     | -     | -       | T      | T         | -   | -   | -      | -        |   |
|            |         | RBD         | O506    | H-bond      | -                                                                                                        | T    | D     | D   | D     | -     | -       | T      | T         | -   | -   | -      | -        |   |
|            |         | RBD         | N439    | H-bond      | -                                                                                                        | T    | D     | D   | D     | -     | -       | T      | T         | -   | -   | -      | -        |   |
|            |         | ACE2        | Q325    | H-bond      | -                                                                                                        | T    | D     | D   | D     | -     | -       | T      | T         | -   | -   | -      | -        |   |
| 330        | N       | ACE2        | R357    | H-bond      | -                                                                                                        | -    | -     | -   | -     | -     | -       | -      | -         | -   | -   | -      | -        |   |
|            |         | ACE2        | D355    | H-bond      | -                                                                                                        | -    | -     | -   | -     | -     | -       | -      | -         | -   | -   | -      | -        |   |
| 353        | K       | RBD         | G496    | H-bond      | -                                                                                                        | -    | -     | D   | D     | -     | T       | -      | -         | -   | -   | -      | -        |   |
|            |         | RBD         | G502    | H-bond      | -                                                                                                        | -    | -     | -   | T     | T     | -       | -      | -         | -   | -   | -      | -        |   |
|            |         | RBD         | Y505    | π           | -                                                                                                        | -    | -     | -   | D     | D     | -       | T      | -         | -   | -   | -      | -        |   |
|            |         | RBD         | Q498    | H-bond      | -                                                                                                        | -    | -     | D   | D     | -     | T       | -      | -         | -   | -   | -      | -        |   |
|            |         | RBD         | N501    | H-bond      | -                                                                                                        | -    | -     | D   | D     | -     | T       | -      | -         | -   | -   | -      | -        |   |
|            |         | ACE2        | D38     | H-bond      | -                                                                                                        | -    | -     | D   | D     | -     | T       | -      | -         | -   | -   | -      | -        |   |
|            |         | ACE2        | Y41     | π           | -                                                                                                        | -    | -     | T   | T     | -     | T       | T      | T         | T   | -   | -      | -        |   |
| 354        | G       | RBD         | G502    | H-bond      | -                                                                                                        | -    | -     | -   | -     | T     | -       | T      | T         | -   | -   | -      | T        |   |
| 355        | D       | RBD         | T500    | H-bond      | -                                                                                                        | -    | -     | -   | -     | -     | -       | -      | -         | -   | -   | -      | -        |   |
|            |         | ACE2        | N330    | H-bond      | -                                                                                                        | -    | -     | -   | -     | -     | -       | -      | -         | -   | -   | -      | -        |   |
|            |         | ACE2        | R357    | H-bond      | -                                                                                                        | -    | -     | -   | -     | -     | -       | -      | -         | -   | -   | -      | -        |   |
|            |         | RBD         | T500    | H-bond      | -                                                                                                        | -    | -     | -   | -     | -     | -       | -      | -         | -   | -   | -      | -        |   |
| 357        | R       | ACE2        | N330    | H-bond      | -                                                                                                        | -    | -     | -   | -     | -     | -       | -      | -         | -   | -   | -      | -        |   |
|            |         | ACE2        | Y41     | H-bond      | -                                                                                                        | -    | -     | -   | -     | -     | -       | -      | -         | -   | -   | -      | -        |   |
|            |         | ACE2        | D355    | H-bond      | -                                                                                                        | -    | -     | -   | -     | -     | -       | -      | -         | -   | -   | -      | -        |   |

817

818

819

820

821 H-bond: hydrogen bond; Vdw: Van der Waals force; D: disruptive; T: tolerated; U:  
 822 unsure; E: enhanced.

823

824 The effects of residues substitution were predicted by homologous-based modeling  
 825 analyses based on the crystal structure of SARS-CoV-2 RBD/hACE2 complex (16).

826
